# Supplementary material
Source: PubMed Central journal article supplement (PMC3337982)
Supplement: NIHMS365709-supplement-Suppl_Fig_Legends.pdf [file NIHMS365709-supplement-Suppl_Fig_Legends.pdf]

## Supplementary figure legends

Figure S1. Col is cell autonomously up-regulated in *Dsulf1<sup>AP1</sup>* clonal anterior cells

(A,A') Expression pattern of Col (red) in wing disc carrying a *Dsulf1<sup>AP1</sup>* clone located in the dorsal part of the A compartment, close to the AP boundary as visualized by the absence of GFP staining (green in A). Note the anterior extension of the Col-expressing domain in dorsal mutant cells compared to ventral wt cells (green). (B) Quantification of fluorescence intensity along the AP axis performed at the level of the *Dsulf1<sup>AP1</sup>* clone (*Ant*, red) or wt cells (WT, green) in the A compartment. The areas used for quantification are indicated by yellow boxes in A'.

Figure S2. Removal of DSulf1 activity in the Hh receiving compartment results in Ptc up-regulation.

(A,A') Immunostaining of Ptc (red in A) in wing disc carrying *Dsulf1<sup>AP1</sup>* clone located in the dorsal part of the A compartment, as visualized by the absence of GFP staining (green in A). (B,B') Quantification of fluorescence intensity at the level of dorsal mutant clonal cells (red, *Ant*) and ventral wt cells (WT, green in B'). The areas used for quantification are indicated by yellow boxes in B. Note the enlargement of Ptc-expressing domain as well as Ptc up-regulation in mutant clonal cells compared to wt (A,A' and B,B'). (C,D) Immunostaining of Ptc showing an enlargement of the Ptc-expressing domain in *Dsulf1<sup>AP1</sup>* (D) mutant disc compared to wt (C). (E) Counting of Ptc-expressing cells in wt and *Dsulf1<sup>AP1</sup>* wing discs and in wing disc carrying *Dsulf1<sup>AP1</sup>* clone in the dorsal part of the A compartment (*Ant*). Error bars represent the standard deviation (\*\*\*)= $P < 0.0005$  using a *t*-test). D = dorsal, V = ventral

Figure S3. Schematic representations of DSulf1 function in regulating Hh signalling in the wing imaginal disc.

In each panel, the blue curve indicates the level of Hh activity. **a.** In late 3<sup>rd</sup> instar wt wing disc, *col* (red) and *dpp* (orange) are activated at specific Hh activity thresholds (dotted lines). We propose that, in the P compartment, DSulf1 lowers Hh/HSPGs binding affinity at the apical surface of Hh-producing cells. This, by favouring the release of Hh from P cells (large purple arrow), contributes to enhance Hh signalling activity in the A receiving field. In the A compartment, DSulf1, acting similarly, decreases Hh signalling activity, thus limiting the anterior extension of Hh target gene expression domains. **b.** The absence of DSulf1 activity only in the A compartment results in an increased Hh/HSPGs interaction in A cells while Hh

release from P cells is not modified. This leads to a forward shift of Hh target gene expression domains. **c.** In absence of DSulf1 activity in the P compartment, Hh release from P cells decreases (small purple arrow), leading to a lowering of Hh signalling activity and to a backward shift of Hh target gene expression domains. **d.** In the complete absence of DSulf1 activity in the wing disc, Hh release from P cells decreases leading to a reduction of Hh signalling activity in A receiving cells. However, this results in a mild enlargement *col* and *dpp* expression domains. The timely regulated expression of *Dsulf1*, restricted to the A compartment at the onset of Hh target gene up-regulation, allows to reconcile these phenotypes. Indeed, in these mutants, the absence of Dsulf1 negative regulatory activity at early 3<sup>rd</sup> instar larval stage can explain the slight anterior extension of Hh target gene domains of expression but the lack of further DSulf1 positive regulatory activity starting, normally from mid 3<sup>rd</sup> instar larval, can account for the mild phenotype compared to disc carrying *Dsulf1* mutant cells only in the A compartment (b).
